# Supplementary material for: Extensive Testing and Public Health Interventions for the Control of COVID-19 in the Republic of Cyprus between March and May 2020
Source: PubMed Central journal article supplement (PMC7695263; doi:10.3390/jcm9113598), 2020-11-08
Supplement: jcm-09-03598-s001.pdf [file jcm-09-03598-s001.pdf]

# Supplementary Materials: Extensive Testing and Public Health Interventions for the Control of COVID-19 in the Republic of Cyprus between March and May 2020

Annalisa Quattrocchi, Ioannis Mamais, Constantinos Tsioutis, Eirini Christaki, Costas Constantinou, Maria Koliou, Zoi-Dorothea Pana, Valentinos Silvestros, Fani Theophanous, Christos Haralambous, Androulla Stylianou, Sotiroula Sotiriou, Maria Athanasiadou, Theopisti Kyprianou, Anna Demetriou, Christiana A. Demetriou, Ourania Kolokotroni, Ioanna Gregoriou, Niki Paphitou, George Panos, Leontios Kostrikis, Peter Karayiannis, Georgios Petrikkos, Petros Agathangleou, George Mixides, Georgios Siakallis, Linos Hadjihannas, Lakis Palazis, Anna Vavlitou, Chrystalla Matsentidou-Timiliotou, Dimitris Koukios, Tonia Adamidi, Frangiskos Frangopoulos, Elizabeth Constantinou and Georgios Nikolopoulos

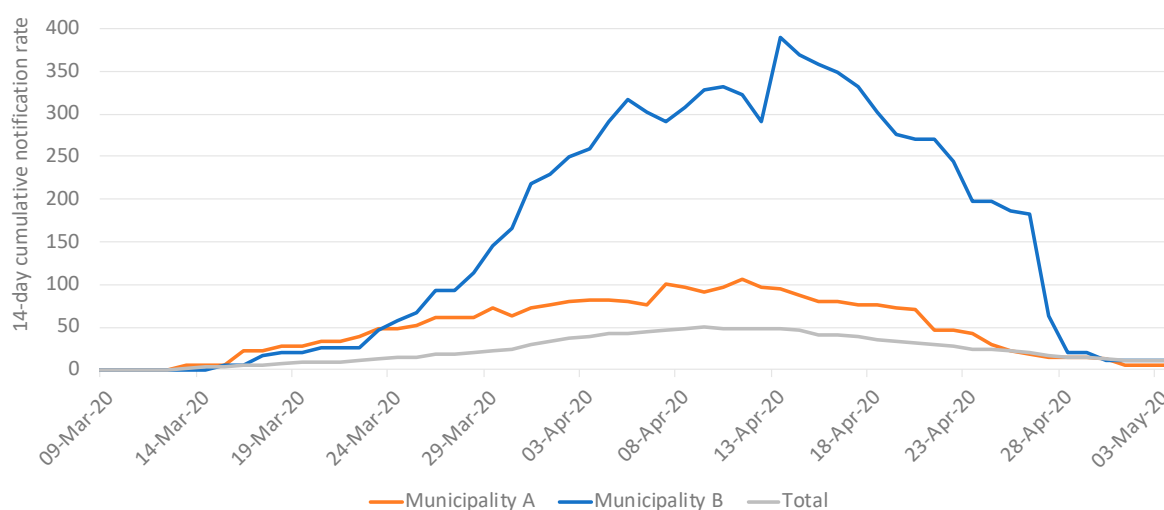

**Figure S1.** 14-day cumulative notification rate (per 100,000 population) in Municipality A, Municipality B and in total, Cyprus March 9th - May 3rd, 2020.

**Table S1.** Age-specific notification rate by sex, Cyprus 9 March–3 May 2020.

| Age groups (years) | TOTAL                          |                |                                      | MALES                          |                |                                      | FEMALES                        |                |                                      |
|--------------------|--------------------------------|----------------|--------------------------------------|--------------------------------|----------------|--------------------------------------|--------------------------------|----------------|--------------------------------------|
|                    | Cyprus Population <sup>1</sup> | Notified cases | Crude Age-specific Notification Rate | Cyprus Population <sup>1</sup> | Notified cases | Crude Age-specific Notification Rate | Cyprus Population <sup>1</sup> | Notified cases | Crude Age-specific Notification Rate |
| Less than 5        | 46,630                         | 14             | 30.02                                | 24,016                         | 5              | 20.82                                | 22,614                         | 9              | 39.80                                |
| From 5 to 9        | 49,104                         | 13             | 26.47                                | 24,966                         | 7              | 28.04                                | 24,138                         | 6              | 24.86                                |
| From 10 to 14      | 45,470                         | 15             | 32.99                                | 23,200                         | 11             | 47.41                                | 22,270                         | 4              | 17.96                                |
| From 15 to 19      | 48,856                         | 19             | 38.89                                | 24,429                         | 8              | 32.75                                | 24,427                         | 11             | 45.03                                |
| From 20 to 24      | 63,295                         | 46             | 72.68                                | 30,018                         | 21             | 69.96                                | 33,277                         | 25             | 75.13                                |
| From 25 to 29      | 74,578                         | 66             | 88.50                                | 36,530                         | 33             | 90.34                                | 38,048                         | 33             | 86.73                                |
| From 30 to 34      | 73,209                         | 83             | 113.37                               | 35,955                         | 45             | 125.16                               | 37,254                         | 38             | 102.00                               |
| From 35 to 39      | 66,650                         | 90             | 135.03                               | 32,678                         | 46             | 140.77                               | 33,972                         | 44             | 129.52                               |
| From 40 to 44      | 56,158                         | 67             | 119.31                               | 27,240                         | 37             | 135.83                               | 28,918                         | 30             | 103.74                               |
| From 45 to 49      | 54,054                         | 85             | 157.25                               | 26,325                         | 41             | 155.75                               | 27,729                         | 44             | 158.68                               |
| From 50 to 54      | 53,871                         | 78             | 144.79                               | 26,614                         | 34             | 127.75                               | 27,257                         | 44             | 161.43                               |
| From 55 to 59      | 54,546                         | 81             | 148.50                               | 26,958                         | 37             | 137.25                               | 27,588                         | 44             | 159.49                               |
| From 60 to 64      | 48,366                         | 58             | 119.92                               | 23,846                         | 25             | 104.84                               | 24,520                         | 33             | 134.58                               |
| From 65 to 69      | 45,193                         | 53             | 117.27                               | 21,966                         | 31             | 141.13                               | 23,227                         | 22             | 94.72                                |

|                  |         |     |        |         |     |        |         |     |        |
|------------------|---------|-----|--------|---------|-----|--------|---------|-----|--------|
| From 70 to<br>74 | 36,574  | 42  | 114.84 | 17,152  | 17  | 99.11  | 19,422  | 25  | 128.72 |
| From 75 to<br>79 | 27,332  | 38  | 139.03 | 12,590  | 22  | 174.74 | 14,742  | 16  | 108.53 |
| 80 and over      | 32,013  | 25  | 78.09  | 13,348  | 17  | 127.36 | 18,665  | 8   | 42.86  |
| Total            | 875,899 | 873 | 99.67  | 427,831 | 437 | 102.14 | 448,068 | 436 | 97.31  |

<sup>1</sup>Data from Statistical Service of the Republic of Cyprus, 2018 [14].

**Table S2.** Characteristics of cases by recovery status, and factors associated with recovery status (univariate), Cyprus 9 March–3 May 2020.

| Characteristics                                     | Recovered/cured |      | Not recovered/cured |      | <i>p</i> <sup>1</sup> |
|-----------------------------------------------------|-----------------|------|---------------------|------|-----------------------|
|                                                     | (n = 396)       |      | (n = 317)           |      |                       |
|                                                     | <i>n</i>        | %    | <i>n</i>            | %    |                       |
| Male                                                | 187             | 47.2 | 163                 | 51.4 | 0.265                 |
| Age group                                           |                 |      |                     |      |                       |
| 0-9                                                 | 9               | 2.3  | 9                   | 2.8  |                       |
| 10-19                                               | 9               | 2.3  | 18                  | 5.7  |                       |
| 20-29                                               | 52              | 13.1 | 35                  | 11.0 |                       |
| 30-39                                               | 87              | 22.0 | 61                  | 19.2 |                       |
| 40-49                                               | 68              | 17.2 | 60                  | 18.9 | 0.439                 |
| 50-59                                               | 79              | 19.9 | 58                  | 18.3 |                       |
| 60-69                                               | 49              | 12.4 | 39                  | 12.3 |                       |
| 70-79                                               | 34              | 8.6  | 27                  | 8.5  |                       |
| 80+                                                 | 9               | 2.3  | 10                  | 3.2  |                       |
| Symptoms at diagnosis (yes)                         | 285             | 73.5 | 219                 | 69.5 | 0.171                 |
| Cough (yes)                                         | 150             | 53.0 | 110                 | 51.6 | 0.764                 |
| Fever (yes)                                         | 126             | 44.5 | 108                 | 51.2 | 0.142                 |
| Sore throat (yes)                                   | 90              | 31.9 | 42                  | 19.9 | <b>0.003</b>          |
| Myalgia (yes)                                       | 93              | 32.9 | 80                  | 37.9 | 0.244                 |
| Shortness of breath/respiratory distress (yes)      | 52              | 19.1 | 40                  | 19.2 | 0.975                 |
| Anosmia (yes)                                       | 53              | 23.2 | 60                  | 32.3 | <b>0.041</b>          |
| Diarrhoea (yes)                                     | 52              | 18.4 | 33                  | 15.6 | 0.412                 |
| Underlying health conditions (yes)                  | 128             | 39.1 | 126                 | 44.7 | 0.167                 |
| Diabetes (yes)                                      | 22              | 8.5  | 30                  | 12.7 | 0.191                 |
| Hypertension (yes)                                  | 49              | 38.3 | 52                  | 41.6 | 0.59                  |
| Heart disease (excluding Hypertension) (yes)        | 25              | 19.8 | 21                  | 16.7 | 0.514                 |
| Chronic kidney disease (yes)                        | 3               | 2.4  | 5                   | 4.0  | 0.722                 |
| Chronic respiratory disease, excluding asthma (yes) | 7               | 6.5  | 3                   | 2.8  | 0.214                 |
| Chronic liver disease (yes)                         | 2               | 1.6  | 1                   | 0.8  | 1                     |
| Immunosuppression/HIV (yes)                         | 7               | 5.7  | 8                   | 6.4  | 0.828                 |
| Cancer (yes)                                        | 7               | 5.5  | 6                   | 4.8  | 0.798                 |
| Neuromuscular disorder, chronic neurological (yes)  | 4               | 3.1  | 7                   | 5.6  | 0.374                 |
| Rheumatic diseases including arthritis (yes)        | 5               | 3.9  | 2                   | 1.6  | 0.447                 |
| Asthma (yes)                                        | 8               | 6.3  | 9                   | 7.1  | 0.776                 |
| Other endocrine disorder (excluding Diabetes) (yes) | 10              | 7.8  | 9                   | 7.1  | 0.839                 |
| Hospitalised (yes)                                  | 64              | 16.2 | 61                  | 19.2 | 0.282                 |

<sup>1</sup>*p* values <0.05 are indicated in bold font.
